# Supplementary material
Source: HighWire-hosted journal article supplement (https://bmjopen.bmj.com/content/14/1/e078555)
Supplement: inline-supplementary-material-3 [file inline-supplementary-material-3.pdf]

**Supplementary file 3.** Participant questionnaires (baseline, 6 weeks post risk feedback and 6 months post risk feedback)

## Breast CANcer – Risk Assessment in Young Women (BCAN-RAY): Acceptability survey (baseline)

**Please enter your unique identifier and date of birth. Your unique identifier can be found on your study invite letter.**

**Unique study identifier:**

**Date of birth:**

SECTION A – YOUR MENTAL WELL-BEING

A number of statements which people have used to describe how they feel are given below. Please read each of the 6 statements and then circle the most appropriate number below the statement to indicate how you feel right now, at this moment. There are no right or wrong answers. Do not spend too much time on any one statement but give the answer which seems to describe your present feelings best.

|    |                |            |          |            |           |
|----|----------------|------------|----------|------------|-----------|
| A1 | I feel calm    | Not at all | Somewhat | Moderately | Very much |
|    |                | 1          | 2        | 3          | 4         |
| A2 | I am tense     | Not at all | Somewhat | Moderately | Very much |
|    |                | 1          | 2        | 3          | 4         |
| A3 | I feel upset   | Not at all | Somewhat | Moderately | Very much |
|    |                | 1          | 2        | 3          | 4         |
| A4 | I am relaxed   | Not at all | Somewhat | Moderately | Very much |
|    |                | 1          | 2        | 3          | 4         |
| A5 | I feel content | Not at all | Somewhat | Moderately | Very much |
|    |                | 1          | 2        | 3          | 4         |
| A6 | I am worried   | Not at all | Somewhat | Moderately | Very much |
|    |                | 1          | 2        | 3          | 4         |

**SECTION B – YOUR WORRIES ABOUT DEVELOPING BREAST CANCER**

Please read the statements below and circle the number below each statement that best indicates your current level of worry about getting breast cancer someday:

**B1**    **How often have you thought about your chances of getting breast cancer?**

|       |        |           |                     |
|-------|--------|-----------|---------------------|
| Never | Rarely | Sometimes | Almost all the time |
| 1     | 2      | 3         | 4                   |

**B2**    **How often have these thoughts affected your mood?**

|       |        |           |                     |
|-------|--------|-----------|---------------------|
| Never | Rarely | Sometimes | Almost all the time |
| 1     | 2      | 3         | 4                   |

**B3**    **How often have these thoughts interfered with your ability to do daily activities?**

|       |        |           |                     |
|-------|--------|-----------|---------------------|
| Never | Rarely | Sometimes | Almost all the time |
| 1     | 2      | 3         | 4                   |

**B4**    **How concerned are you about the possibility of getting breast cancer one day?**

|            |          |          |       |
|------------|----------|----------|-------|
| Not at all | A little | Somewhat | A lot |
| 1          | 2        | 3        | 4     |

**B5**    **How often do you worry about developing breast cancer?**

|       |        |           |                     |
|-------|--------|-----------|---------------------|
| Never | Rarely | Sometimes | Almost all the time |
| 1     | 2      | 3         | 4                   |

**B6**    **How much of a problem is this worry?**

|            |          |          |       |
|------------|----------|----------|-------|
| Not at all | A little | Somewhat | A lot |
| 1          | 2        | 3        | 4     |

SECTION C – YOUR PERCEPTION OF BREAST CANCER RISK

Please tick **ONE** of the statements below that best describes your breast cancer risk in relation to other women of a similar age:

C1 Compared to other women my age, I believe my risk of developing breast cancer in the next 10 years is...

- ☐ Much higher
- ☐ A bit higher
- ☐ About the same
- ☐ A bit lower
- ☐ Much lower

SECTION D – YOUR ATTITUDES TOWARD BREAST CANCER RISK ASSESSMENT

Please read the statement and items below and circle the number that best indicates how you feel about participating in breast cancer risk assessment right now, at this moment:

D1 Taking part in breast cancer risk assessment will be...

|                     |                   |                                   |                    |                      |
|---------------------|-------------------|-----------------------------------|--------------------|----------------------|
| Entirely good       | Mainly good       | Neither good nor bad              | Mainly bad         | Entirely bad         |
| 1                   | 2                 | 3                                 | 4                  | 5                    |
| Entirely beneficial | Mainly beneficial | Neither beneficial nor harmful    | Mainly harmful     | Entirely harmful     |
| 1                   | 2                 | 3                                 | 4                  | 5                    |
| Entirely important  | Mainly important  | Neither important nor unimportant | Mainly unimportant | Entirely unimportant |
| 1                   | 2                 | 3                                 | 4                  | 5                    |

**SECTION E – INTEREST IN INTERVIEW**

We would like to hear more about your experience of participating in breast cancer risk assessment as part of the BCAN-RAY study. Please tick one box to indicate whether you are happy to be contacted about participating in an interview (over the phone or face-to-face).

**E1**

**I am happy to be contacted about participating in an interview following receipt of my risk results**

YES ☐NO ☐

***Thank you for completing this questionnaire.***

***Please return your completed questionnaire to the study team in the pre-paid envelope provided.***

**Sources of information and support**

You may find some of the following sources of information and support useful if you have any concerns about breast health.

**CoppaFeel!**

Website: <https://coppafeel.org/>

They have a section that provides guidance on checking your breasts:

<https://self-checkout.coppafeel.org/onboarding>

**Breast Cancer Now**

Website: <https://breastcancernow.org/>

They have a section where you can ask any questions you have relating to breast health:

<https://forum.breastcancernow.org/t5/Ask-Our-Nurses/ct-p/Asknurses>

They also offer a free, confidential helpline to answer questions about breast cancer or breast health – 0808 800 6000 (Text relay prefix – 18001)

# Breast **CAN**cer – Risk Assessment in Young Women (**BCAN-RAY**): Acceptability survey (6 weeks post risk feedback)

Please enter your unique identifier and date of birth. Your unique identifier can be found on your study invite letter.

Unique study identifier:

Date of birth:

SECTION A – YOUR MENTAL WELL-BEING

A number of statements which people have used to describe how they feel are given below. Please read each of the 6 statements and then circle the most appropriate number below the statement to indicate how you feel right now, at this moment. There are no right or wrong answers. Do not spend too much time on any one statement but give the answer which seems to describe your present feelings best.

|    |                |            |          |            |           |
|----|----------------|------------|----------|------------|-----------|
| A1 | I feel calm    | Not at all | Somewhat | Moderately | Very much |
|    |                | 1          | 2        | 3          | 4         |
| A2 | I am tense     | Not at all | Somewhat | Moderately | Very much |
|    |                | 1          | 2        | 3          | 4         |
| A3 | I feel upset   | Not at all | Somewhat | Moderately | Very much |
|    |                | 1          | 2        | 3          | 4         |
| A4 | I am relaxed   | Not at all | Somewhat | Moderately | Very much |
|    |                | 1          | 2        | 3          | 4         |
| A5 | I feel content | Not at all | Somewhat | Moderately | Very much |
|    |                | 1          | 2        | 3          | 4         |
| A6 | I am worried   | Not at all | Somewhat | Moderately | Very much |
|    |                | 1          | 2        | 3          | 4         |

**SECTION B – YOUR WORRIES ABOUT DEVELOPING BREAST CANCER**

Please read the statements below and circle the number below each statement that best indicates your current level of worry about getting breast cancer someday:

**B1**    **How often have you thought about your chances of getting breast cancer?**

|       |        |           |                     |
|-------|--------|-----------|---------------------|
| Never | Rarely | Sometimes | Almost all the time |
| 1     | 2      | 3         | 4                   |

**B2**    **How often have these thoughts affected your mood?**

|       |        |           |                     |
|-------|--------|-----------|---------------------|
| Never | Rarely | Sometimes | Almost all the time |
| 1     | 2      | 3         | 4                   |

**B3**    **How often have these thoughts interfered with your ability to do daily activities?**

|       |        |           |                     |
|-------|--------|-----------|---------------------|
| Never | Rarely | Sometimes | Almost all the time |
| 1     | 2      | 3         | 4                   |

**B4**    **How concerned are you about the possibility of getting breast cancer one day?**

|            |          |          |       |
|------------|----------|----------|-------|
| Not at all | A little | Somewhat | A lot |
| 1          | 2        | 3        | 4     |

**B5**    **How often do you worry about developing breast cancer?**

|       |        |           |                     |
|-------|--------|-----------|---------------------|
| Never | Rarely | Sometimes | Almost all the time |
| 1     | 2      | 3         | 4                   |

**B6**    **How much of a problem is this worry?**

|            |          |          |       |
|------------|----------|----------|-------|
| Not at all | A little | Somewhat | A lot |
| 1          | 2        | 3        | 4     |



SECTION C – YOUR PERCEPTION OF BREAST CANCER RISK

Please tick **ONE** of the statements below that best describes your breast cancer risk in relation to other women of a similar age:

**C1** Compared to other women my age, I believe my risk of developing breast cancer in the next 10 years is...

- ☐ Much higher
- ☐ A bit higher
- ☐ About the same
- ☐ A bit lower
- ☐ Much lower

SECTION D – YOUR BREAST CANCER RISK KNOWLEDGE

Please read the statement below and then circle the most appropriate number below the statement to indicate how informed you feel about your breast cancer risk at this moment:

**D1** How informed do you feel about your breast cancer risk?

|                    |                     |                  |                          |
|--------------------|---------------------|------------------|--------------------------|
| Very well informed | Quite well informed | Quite uninformed | Not very informed at all |
| 1                  | 2                   | 3                | 4                        |

**SECTION E – YOUR KNOWLEDGE**

For each question please place **ONE** tick in the box that corresponds with your knowledge/understanding of breast cancer risk assessment being offered in the BCAN-RAY study.

**E1**

**Who are the intended participants of breast cancer risk assessment in the BCAN-RAY study?**

- ☐ Women who have been told by a healthcare professional that they have a strong family history of breast cancer
- ☐ Women who have not been told by a healthcare professional that they have a strong family history of breast cancer

**E2**

**What is the purpose of the low dose mammogram in the BCAN-RAY study?**

- ☐ To assess breast density (the amount of tissue in your breast that is not fat)
- ☐ To detect breast cancer

**E3**

**Who will be given the opportunity to discuss additional breast screening and risk reducing measures with a clinician in the BCAN-RAY study?**

- ☐ Only women identified as being at increased risk of breast cancer
- ☐ All women who participate in the study

**SECTION F – YOUR PERCEPTIONS OF THE BREAST CANCER INFORMATION ENCLOSED WITH YOUR RISK FEEDBACK**

Thinking about the letter and leaflets you received when you were provided with your risk of developing breast cancer in the next 10 years, please read each statement and then circle the most appropriate number below the statement to indicate how you feel about the information (*please circle **only one number***).

**F1**      **I feel well informed about my breast cancer risk.**

|                |       |                |           |                   |          |                   |
|----------------|-------|----------------|-----------|-------------------|----------|-------------------|
| Strongly agree | Agree | Somewhat agree | Undecided | Disagree somewhat | Disagree | Strongly disagree |
| 1              | 2     | 3              | 4         | 5                 | 6        | 7                 |

**F2**      **I feel satisfied with the amount of information I have been given.**

|                |       |                |           |                   |          |                   |
|----------------|-------|----------------|-----------|-------------------|----------|-------------------|
| Strongly agree | Agree | Somewhat agree | Undecided | Disagree somewhat | Disagree | Strongly disagree |
| 1              | 2     | 3              | 4         | 5                 | 6        | 7                 |

**F3**      **I am confused by the information I have been given.**

|                |       |                |           |                   |          |                   |
|----------------|-------|----------------|-----------|-------------------|----------|-------------------|
| Strongly agree | Agree | Somewhat agree | Undecided | Disagree somewhat | Disagree | Strongly disagree |
| 1              | 2     | 3              | 4         | 5                 | 6        | 7                 |

**F4**      **The information was clear.**

|                |       |                |           |                   |          |                   |
|----------------|-------|----------------|-----------|-------------------|----------|-------------------|
| Strongly agree | Agree | Somewhat agree | Undecided | Disagree somewhat | Disagree | Strongly disagree |
| 1              | 2     | 3              | 4         | 5                 | 6        | 7                 |

***Thank you for completing this questionnaire.***  
***Please return your completed questionnaire to the study team in the pre-paid envelope provided.***

### **Sources of information and support**

You may find some of the following sources of information and support useful if you have any concerns about breast health.

#### **CoppaFeel!**

Website: <https://coppafeel.org/>

They have a section that provides guidance on checking your breasts:

<https://self-checkout.coppafeel.org/onboarding>

#### **Breast Cancer Now**

Website: <https://breastcancernow.org/>

They have a section where you can ask any questions you have relating to breast health:

<https://forum.breastcancernow.org/t5/Ask-Our-Nurses/ct-p/Asknurses>

They also offer a free, confidential helpline to answer questions about breast cancer or breast health – 0808 800 6000 (Text relay prefix – 18001)

# Breast **CAN**cer – Risk Assessment in Young Women (**BCAN-RAY**): Acceptability survey (6 months post risk feedback)

**Please enter your unique identifier and date of birth. Your unique identifier can be found on your study invite letter.**

**Unique study identifier:**

**Date of birth:**

SECTION A – YOUR MENTAL WELL-BEING

A number of statements which people have used to describe how they feel are given below. Please read each of the 6 statements and then circle the most appropriate number below the statement to indicate how you feel right now, at this moment. There are no right or wrong answers. Do not spend too much time on any one statement but give the answer which seems to describe your present feelings best.

|    |                |            |          |            |           |
|----|----------------|------------|----------|------------|-----------|
| A1 | I feel calm    | Not at all | Somewhat | Moderately | Very much |
|    |                | 1          | 2        | 3          | 4         |
| A2 | I am tense     | Not at all | Somewhat | Moderately | Very much |
|    |                | 1          | 2        | 3          | 4         |
| A3 | I feel upset   | Not at all | Somewhat | Moderately | Very much |
|    |                | 1          | 2        | 3          | 4         |
| A4 | I am relaxed   | Not at all | Somewhat | Moderately | Very much |
|    |                | 1          | 2        | 3          | 4         |
| A5 | I feel content | Not at all | Somewhat | Moderately | Very much |
|    |                | 1          | 2        | 3          | 4         |
| A6 | I am worried   | Not at all | Somewhat | Moderately | Very much |
|    |                | 1          | 2        | 3          | 4         |

**SECTION B – YOUR WORRIES ABOUT DEVELOPING BREAST CANCER**

Please read the statements below and circle the number below each statement that best indicates your current level of worry about getting breast cancer someday:

**B1**    **How often have you thought about your chances of getting breast cancer?**

|       |        |           |                     |
|-------|--------|-----------|---------------------|
| Never | Rarely | Sometimes | Almost all the time |
| 1     | 2      | 3         | 4                   |

**B2**    **How often have these thoughts affected your mood?**

|       |        |           |                     |
|-------|--------|-----------|---------------------|
| Never | Rarely | Sometimes | Almost all the time |
| 1     | 2      | 3         | 4                   |

**B3**    **How often have these thoughts interfered with your ability to do daily activities?**

|       |        |           |                     |
|-------|--------|-----------|---------------------|
| Never | Rarely | Sometimes | Almost all the time |
| 1     | 2      | 3         | 4                   |

**B4**    **How concerned are you about the possibility of getting breast cancer one day?**

|            |          |          |       |
|------------|----------|----------|-------|
| Not at all | A little | Somewhat | A lot |
| 1          | 2        | 3        | 4     |

**B5**    **How often do you worry about developing breast cancer?**

|       |        |           |                     |
|-------|--------|-----------|---------------------|
| Never | Rarely | Sometimes | Almost all the time |
| 1     | 2      | 3         | 4                   |

**How much of a problem is this worry?**

|           |            |          |          |       |
|-----------|------------|----------|----------|-------|
| <b>B6</b> | Not at all | A little | Somewhat | A lot |
|           | 1          | 2        | 3        | 4     |

SECTION C – YOUR PERCEPTION OF BREAST CANCER RISK

Please tick **ONE** of the statements below that best describes your breast cancer risk in relation to other women of a similar age:

**C1** Compared to other women my age, I believe my risk of developing breast cancer in the next 10 years is...

- ☐ Much higher
- ☐ A bit higher
- ☐ About the same
- ☐ A bit lower
- ☐ Much lower

SECTION D – YOUR ATTITUDES TOWARD BREAST CANCER RISK ASSESSMENT

Please read the statement and items below and circle the number that best indicates how you feel about participating in breast cancer risk assessment right now, at this moment:

**D1** Taking part in breast cancer risk assessment was...

|                     |                   |                                   |                    |                      |
|---------------------|-------------------|-----------------------------------|--------------------|----------------------|
| Entirely good       | Mainly good       | Neither good nor bad              | Mainly bad         | Entirely bad         |
| 1                   | 2                 | 3                                 | 4                  | 5                    |
| Entirely beneficial | Mainly beneficial | Neither beneficial nor harmful    | Mainly harmful     | Entirely harmful     |
| 1                   | 2                 | 3                                 | 4                  | 5                    |
| Entirely important  | Mainly important  | Neither important nor unimportant | Mainly unimportant | Entirely unimportant |
| 1                   | 2                 | 3                                 | 4                  | 5                    |



**SECTION E – YOUR SATISFACTION WITH DECISION TO PARTICIPATE IN BREAST CANCER RISK ASSESSMENT**

Please read the statement below and then circle the most appropriate number below the statement to indicate how satisfied you are with your decision to participate in breast cancer risk assessment.

**E1**

**The decision to participate in breast cancer risk assessment was a good decision for me**

Strongly agree

Agree

Neither agree nor disagree

Disagree

Strongly disagree

1

2

3

4

5

***Thank you for completing this questionnaire.***

***Please return your completed questionnaire to the study team in the pre-paid envelope provided.***

**Sources of information and support**

You may find some of the following sources of information and support useful if you have any concerns about breast health.

**CoppaFeel!**

Website: <https://coppafeel.org/>

They have a section that provides guidance on checking your breasts:

<https://self-checkout.coppafeel.org/onboarding>

**Breast Cancer Now**

Website: <https://breastcancernow.org/>

They have a section where you can ask any questions you have relating to breast health:

<https://forum.breastcancernow.org/t5/Ask-Our-Nurses/ct-p/Asknurses>

They also offer a free, confidential helpline to answer questions about breast cancer or breast health – 0808 800 6000 (Text relay prefix – 18001)
